# Supplementary material
Source: Springer Nature journal article supplement (https://www.springermedizin.de/resource/supplementary/13054_2010_9530_MOESM5_ESM.pdf/9706364)

# Central Amygdala

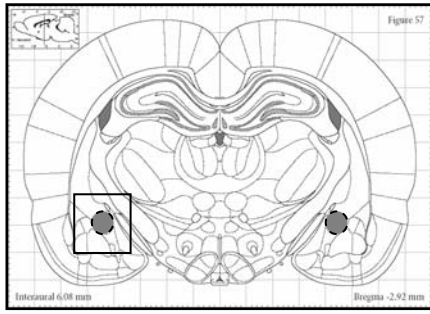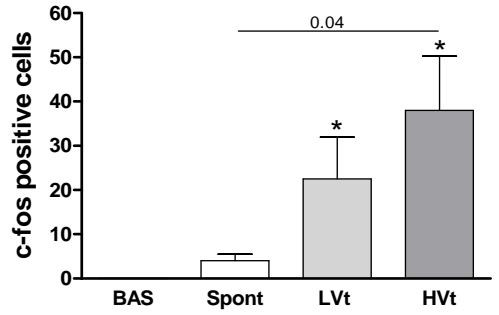

**cresyl**

**cfos**

**BAS**

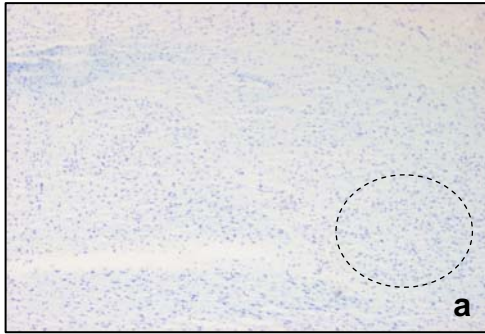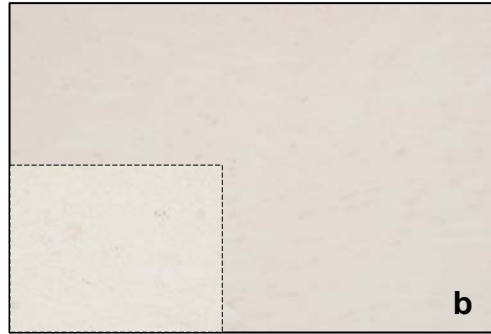

**Spont**

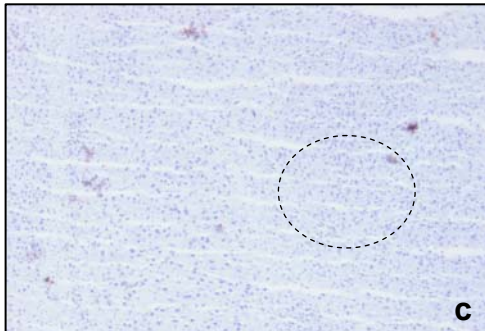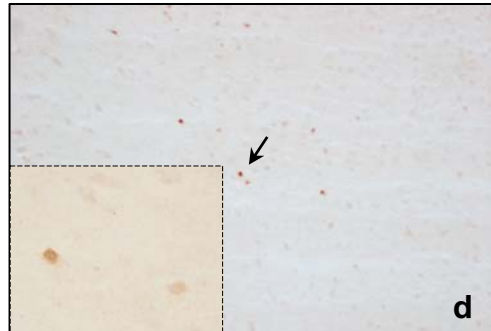

**LVt**

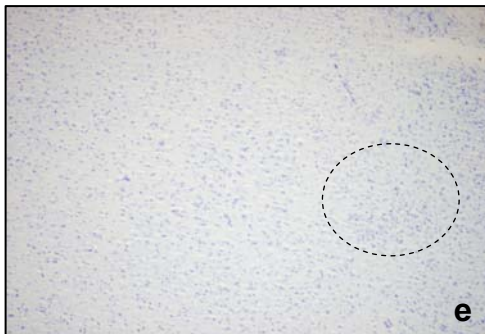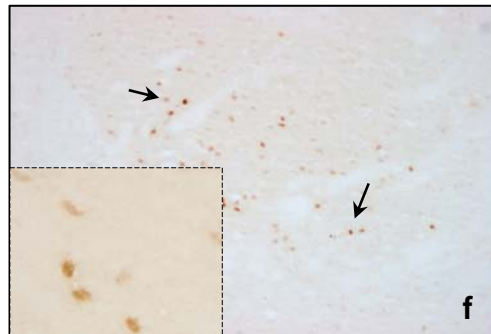

**HVt**

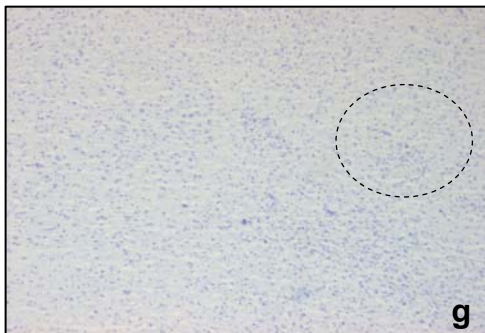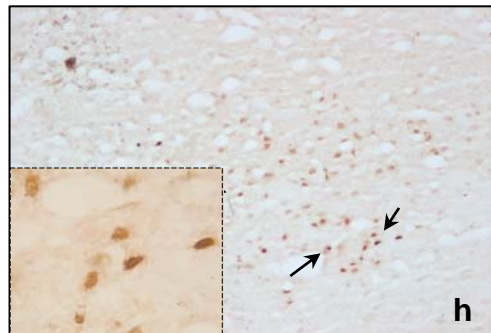

Supplement: MOESM5 [file 9706364]
